# Supplementary material for: Thermo-responsive gels based on supramolecular assembly of an amidoamine and citric acid
Source: Royal Society of Chemistry journal article supplement (doi:10.1039/c7sm01592e), 2017-12-04
Supplement: c7sm01592e1.pdf [file c7sm01592e1.pdf]

## Supporting Information

# Thermo-responsive gels based on supramolecular assembly of an amidoamine and citric acid

Li Hao,<sup>a,b#</sup> Cengiz Yegin,<sup>c#</sup> Jyothsna Varsha Talari,<sup>a</sup> Jun Kyun Oh,<sup>a</sup> Ming Zhang,<sup>e</sup> Mufrettin Murat Sari,<sup>a</sup> Luhong Zhang,<sup>b</sup> Younjin Min,<sup>e</sup> Mustafa Akbulut,<sup>a,c,d\*</sup> Bin Jiang,<sup>b\*\*</sup>

<sup>a</sup>Artie McFerrin Department of Chemical Engineering, Texas A&M University, College Station, Texas 77843-3122, USA;

<sup>b</sup>School of Chemical Engineering and Technology, Tianjin University, Tianjin 300072, China;

<sup>c</sup>Department of Materials Science and Engineering, Texas A&M University, College Station, Texas 77843-3003, USA;

<sup>d</sup>Texas A&M Energy Institute, Texas A&M University, College Station, Texas 77843-3372, USA;

<sup>e</sup>Department of Polymer Engineering, University of Akron, Akron, Ohio 44325, USA;

## Characterization of chemical structure

ATR-FTIR spectroscopic studies were also carried out to investigate chemical structure before and after heating and the formation of thermo-responsive supramolecular amphiphile system, which indicated that a number of spectral changes occurred during gelation, shown in Figure S1.

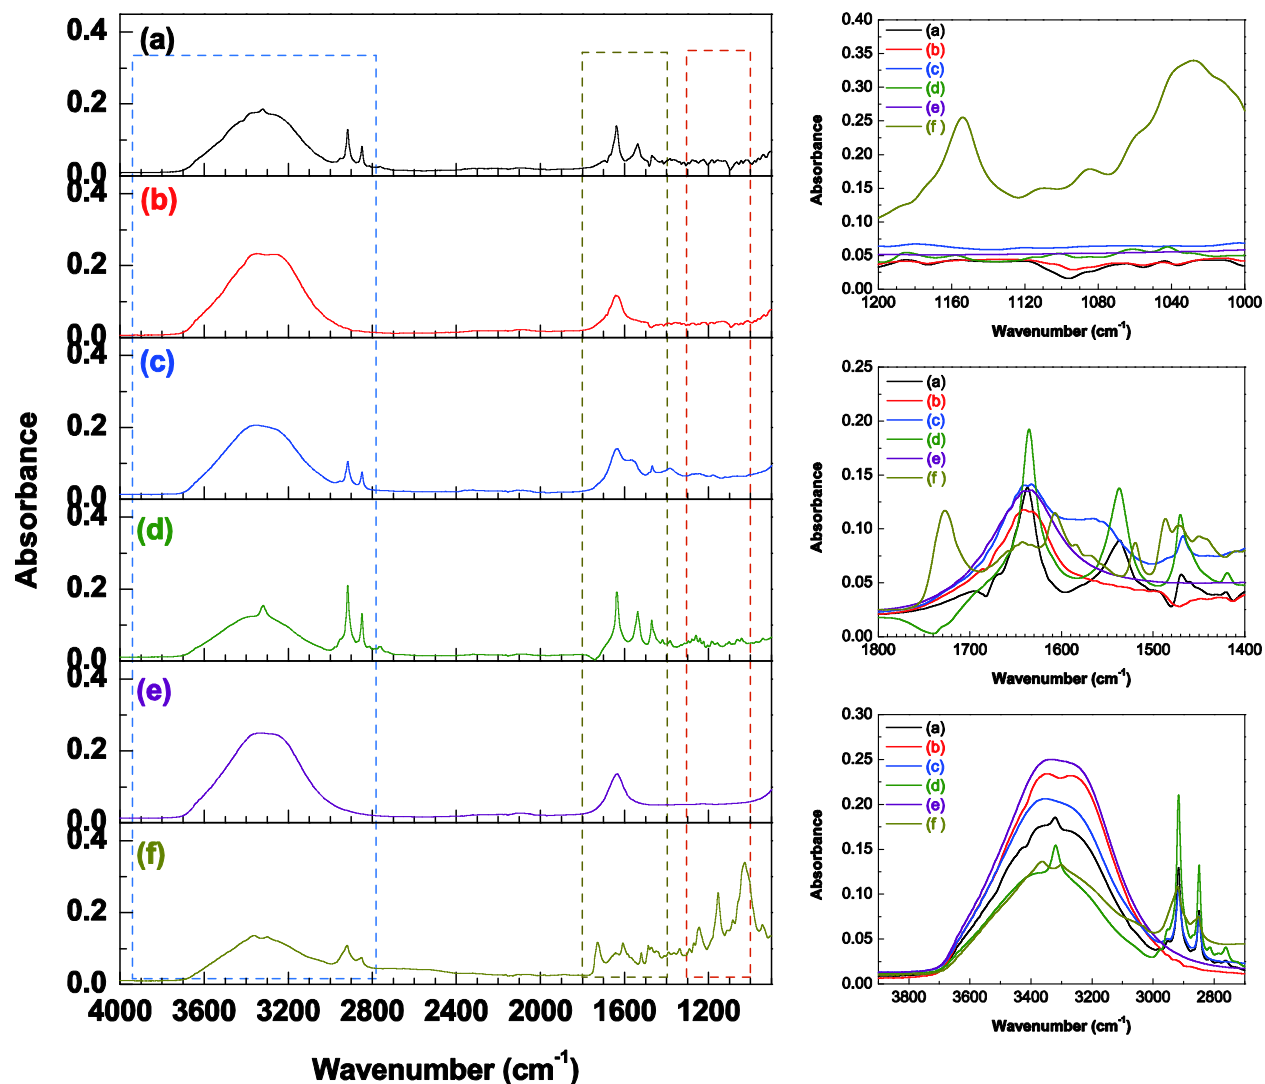

**Fig. S1** ATR-FTIR spectra of (a) amino-amide **A** aqueous solution at room temperature; (b) citric acid aqueous solution at room temperature; (c) thermo-responsive supramolecular **C** at room temperature; (d) amino-amide **A** aqueous solution at 90 °C; (e) citric acid aqueous solution at 90 °C; (f) thermo-responsive supramolecular **C** at 90 °C.

The chemical structures of amino-amide **A** and citric acid were characterized by ATR-FTIR spectroscopy analysis. The ATR-FTIR spectra were shown in Figure S2. The main peaks of amino-amide **A** were observed at 3308  $\text{cm}^{-1}$  (NH str.), 2908, 2845  $\text{cm}^{-1}$  (CH str.), 1638  $\text{cm}^{-1}$  (C=O str.), 1547  $\text{cm}^{-1}$  (NH bend), 1460, 1375  $\text{cm}^{-1}$  (CH bend), 1036  $\text{cm}^{-1}$  (CN str.). The main peaks of citric acid were observed at 3497  $\text{cm}^{-1}$  (OH str.), 3273  $\text{cm}^{-1}$  (CH), 1740  $\text{cm}^{-1}$  (C=O str.), 1688  $\text{cm}^{-1}$  (C=O str.), 1427  $\text{cm}^{-1}$  (C-O-H bend), 1383  $\text{cm}^{-1}$  (C-O-H bend), 1352  $\text{cm}^{-1}$  (C-O-H bend), 1233  $\text{cm}^{-1}$  (C-O str.), 1213  $\text{cm}^{-1}$  (C-O str.), 1192  $\text{cm}^{-1}$  (C-O str.), 1167  $\text{cm}^{-1}$  (C-O str.), 1130  $\text{cm}^{-1}$  (C-O str), 1078  $\text{cm}^{-1}$  (C-O-H str), 1045  $\text{cm}^{-1}$  (C-O-H str), 932  $\text{cm}^{-1}$  (C=O bend).

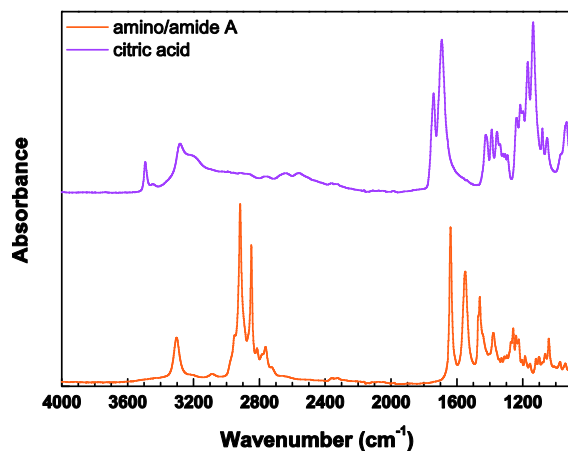

**Fig. S2** ATR-FTIR spectra of amino-amide **A** and citric acid at room temperature.

### Thermal property analysis

Figure S3 demonstrates the temperature-dependent hydrodynamic diameters in amino-amide **A** aqueous solution upon heating from 23 °C to 90 °C. The hydrodynamic diameter, which is the indicator of characteristic size of supramolecular assembly, increased with increasing temperature in the range of 23 °C to 62°C. At higher temperatures, the hydrodynamic size gradually decreased and fully vanished in the range of 85-90°C. Since we do not know the exact

morphology of the assembly and the reported size is based on the assumption of a spherical shape, we use the hydrodynamics size only for a comparison purpose. The solution A became clear yellow upon heating from room temperature to 90 °C as can be seen from Figure 1.

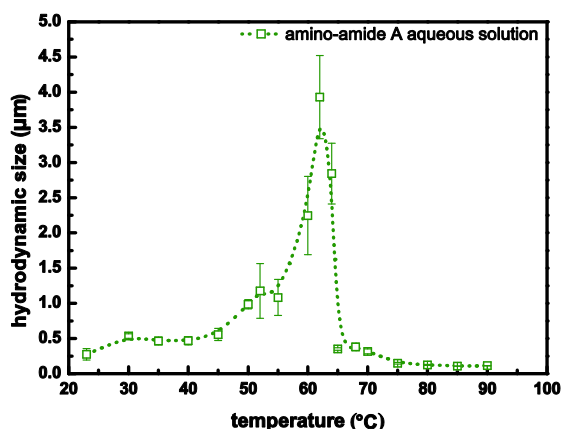

**Fig. S3** Hydrodynamic size of supramolecular system involving amino-amide as a function of temperature

### Rheological characteristics

In this work, we also investigated the viscoelasticity of supramolecular system with concentration of 2.5 wt%. In Figure S4, the storage modulus ( $G'$ ) and loss modulus ( $G''$ ) were monitored over the frequency in the range of 0.01-100 Hz at three different temperatures, which indicated that the supramolecular system still exhibited obvious gelation behavior upon increasing temperature even with 2.5 wt% concentration.

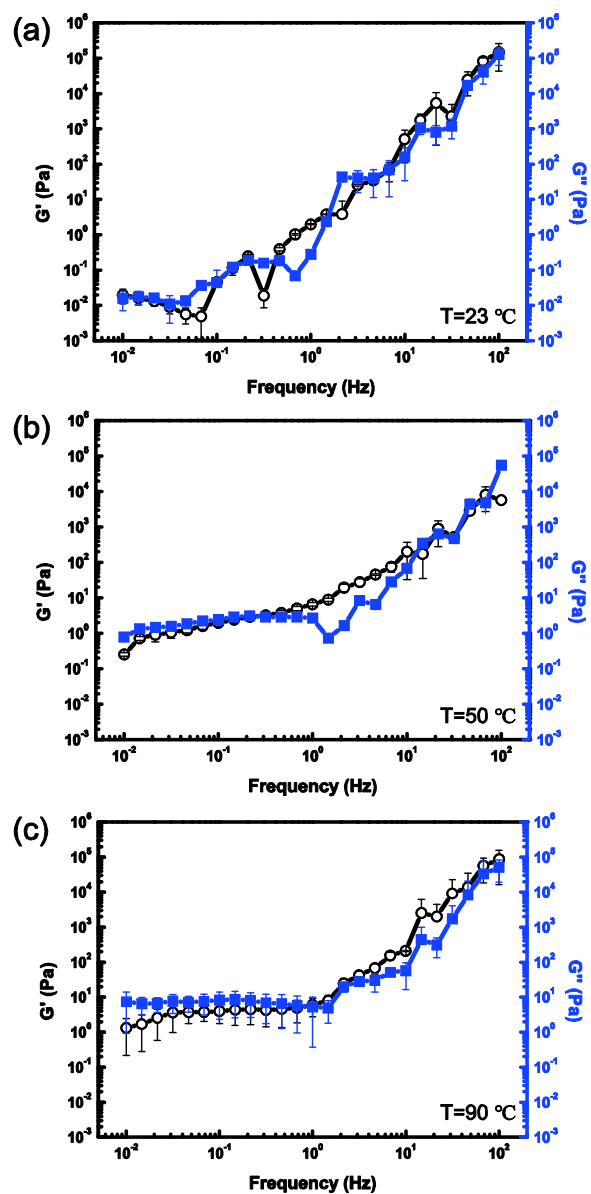

**Fig. S4.** Storage ( $G'$ ) and loss ( $G''$ ) moduli of thermo-responsive supramolecular amphiphile system with amino-amide concentration of 2.5 wt% at (a) 23°C, (b) 50°C, and (c) 90°C.
